# Supplementary material for: Systemic MEK inhibition enhances the efficacy of 5-aminolevulinic acid-photodynamic therapy
Source: PubMed Central journal article supplement (PMC6889170; doi:10.1038/s41416-019-0586-3), 2019-09-25
Supplement: 41416_2019_586_MOESM1_ESM.pdf [file 41416_2019_586_MOESM1_ESM.pdf]

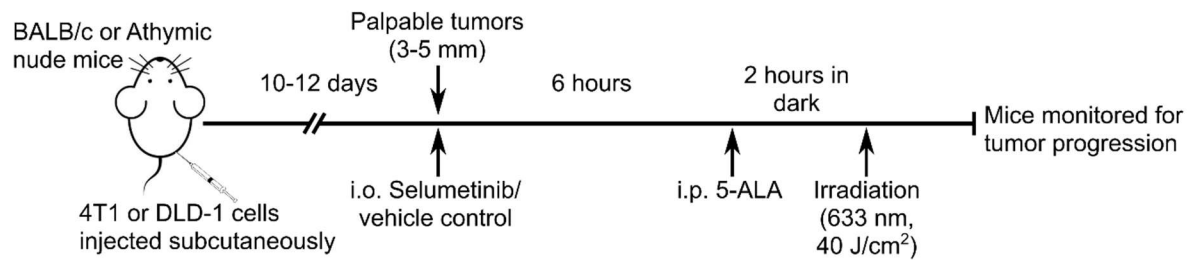

**Figure S1. Schematic representation of animal treatment.**

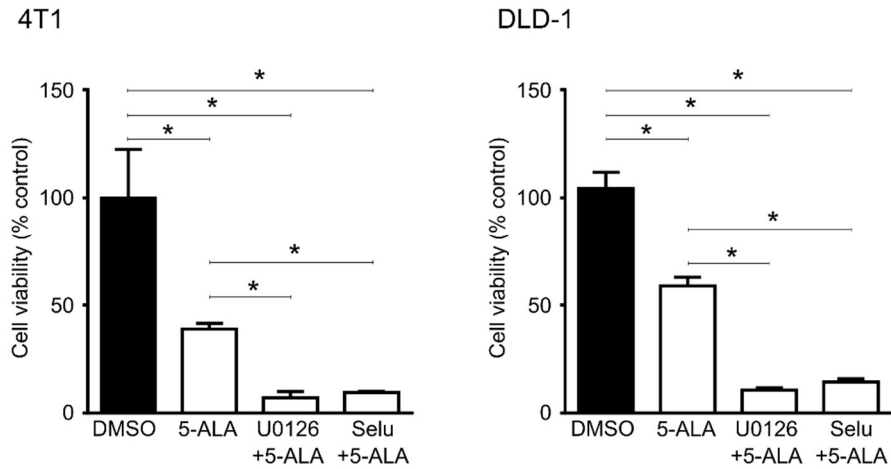

**Figure S2. MEK inhibitors promote cell death by 5-ALA-PDT in cancer cell lines *in vitro*.** 4T1

and DLD-1 cells were treated with or without MEK inhibitors U0126 (20  $\mu$ M) or selumetinib (20  $\mu$ M) for 20 h and then with 5-ALA (5 mM) for 4 h followed by irradiation. Mean  $\pm$  SD of % Cell viability at 24 h after 5-ALA-PDT compared to control (DMSO, black bar) from three independent experiments is shown. \* $p$ <0.01 by one-way ANOVA with Turkey's posthoc test.

| <b>5-ALA (mM)</b> | <b>U0126 (<math>\mu</math>M)</b> | <b>CI</b>   |
|-------------------|----------------------------------|-------------|
| 0.5               | 2.5                              | <b>0.60</b> |
| 0.5               | 5.0                              | <b>0.49</b> |
| 0.5               | 10.0                             | <b>0.28</b> |
| 0.5               | 20.0                             | <b>0.12</b> |
| 5.0               | 2.5                              | <b>0.90</b> |
| 5.0               | 5.0                              | <b>0.83</b> |
| 5.0               | 10.0                             | <b>0.62</b> |
| 5.0               | 20.0                             | <b>0.06</b> |

**Supplementary Table 1.** Chou and Talalay analysis of the interaction between 5-ALA PDT and MEK inhibitor U0126. The table shows the combination indices (CI) for the treatment combinations shown in Figure 3.
